# Supplementary material for: In Vivo Structural and Functional Abnormalities of the Striatums Is Related to Decreased Astrocytic BDNF in Itpr2-/- Mice Exhibiting Depressive-Like Behavior
Source: Hindawi journal article supplement (doi:10.1155/2020/8830670), 2020-09-01
Supplement: f1 [file 8830670.f1.pdf]

## Supplementary materials

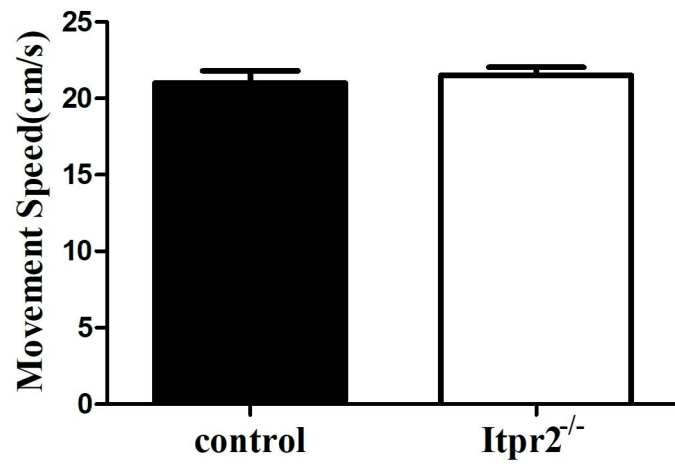

FIGURE 1. Movement speed of *Itpr2*<sup>-/-</sup> and control group in OFT.
